# Supplementary material
Source: Springer Nature journal article supplement (https://www.springermedizin.de/resource/supplementary/12986_2011_426_MOESM1_ESM.pdf/25656068)

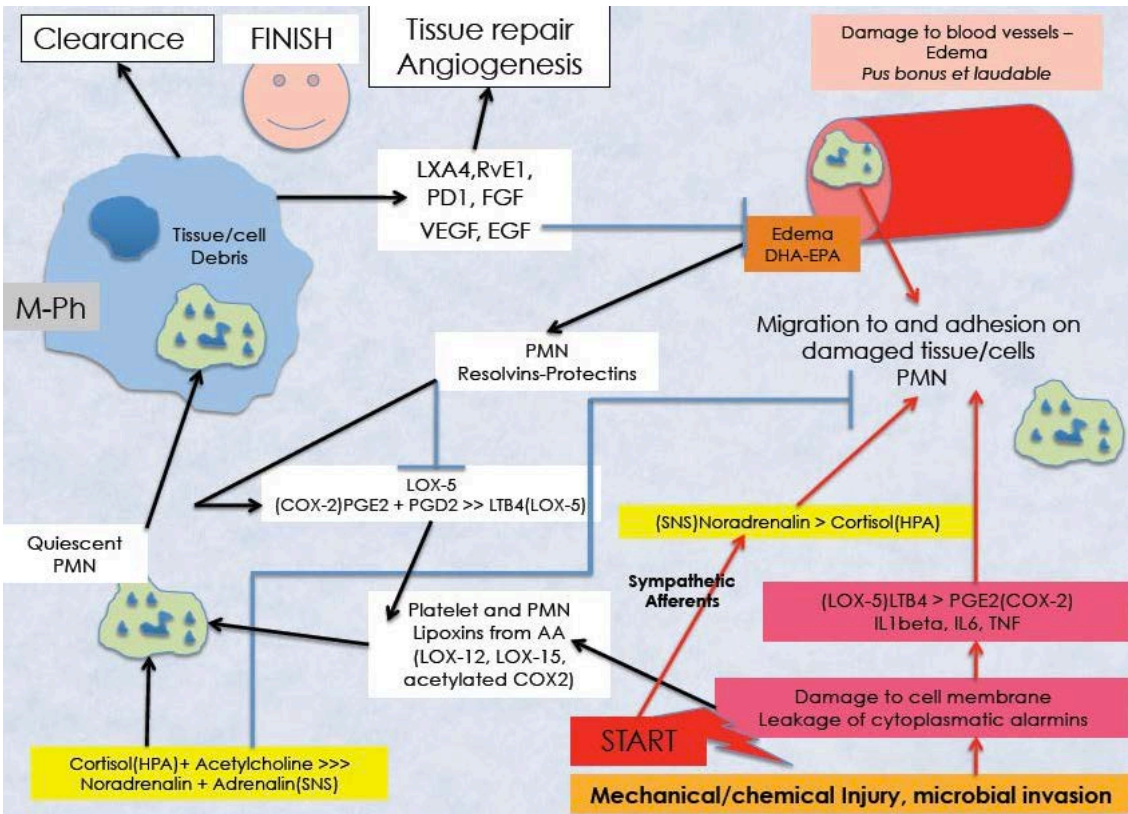

Supplement: MOESM1 [file 25656068]
